# Supplementary material for: Statins Reduce Hepatocellular Carcinoma Risk in Patients with Chronic Kidney Disease and End-Stage Renal Disease: A 17-Year Longitudinal Study
Source: MDPI journal article supplement (doi:10.3390/cancers14030825), 2022-02-06
Supplement: s1 [file s1]

## Statins reduce hepatocellular carcinoma risk in patients with chronic kidney disease and end-stage renal disease, a 17-year longitudinal study

Fung-Chang Sung, Yi-Ting Yeh, Chih-Hsin Muo, Chih-Cheng Hsu, Wen-Chen Tsai and Yueh-Han Hsu

Table S1. Case-control analysis of hepatocellular carcinoma in statin user cohort

| Variable                  | HCC<br>N=2659 |      | Non-HCC<br>N=464431 |      | Total<br>N=467090 |      | Odds ratio (95% confidence interval) |         |                  |         |
|---------------------------|---------------|------|---------------------|------|-------------------|------|--------------------------------------|---------|------------------|---------|
|                           | n             | %    | n                   | %    | n                 | %    | Crude                                | p       | Adjusted         | p       |
| Age, year                 |               |      |                     |      |                   |      |                                      |         |                  |         |
| 40-54                     | 614           | 23.1 | 157512              | 33.9 | 158126            | 33.9 | Ref.                                 |         | Ref.             |         |
| 55-64                     | 822           | 30.9 | 156756              | 33.8 | 157578            | 33.7 | 1.35 (1.21-1.49)                     | <0.0001 | 1.55 (1.40-1.73) | <0.0001 |
| 65-80                     | 1223          | 46.0 | 150163              | 32.3 | 151386            | 32.4 | 2.09 (1.90-2.30)                     | <0.0001 | 2.50 (2.25-2.77) | <0.0001 |
| Sex                       |               |      |                     |      |                   |      |                                      |         |                  |         |
| Men                       | 1837          | 69.1 | 231614              | 49.9 | 233451            | 50.0 | 2.25 (2.07-2.44)                     | <0.0001 | 2.35 (2.16-2.56) | <0.0001 |
| Women                     | 822           | 30.9 | 232817              | 50.1 | 233639            | 50.0 | Ref.                                 |         |                  |         |
| Income, NTD               |               |      |                     |      |                   |      |                                      |         |                  |         |
| <16500                    | 515           | 19.4 | 101877              | 21.9 | 102392            | 21.9 | 1.30 (1.13-1.49)                     | 0.0002  | 1.23 (1.07-1.42) | 0.003   |
| 16500-21900               | 1181          | 44.4 | 144792              | 31.2 | 145973            | 31.3 | 2.10 (1.86-2.36)                     | <0.0001 | 2.09 (1.85-2.36) | <0.0001 |
| 21901-31800               | 340           | 12.8 | 87325               | 18.8 | 87665             | 18.8 | Ref.                                 |         | Ref.             |         |
| >31800                    | 623           | 23.4 | 130437              | 28.1 | 131060            | 28.1 | 1.23 (1.08-1.40)                     | 0.003   | 1.34 (1.17-1.54) | <0.0001 |
| Living area               |               |      |                     |      |                   |      |                                      |         |                  |         |
| North                     | 987           | 37.1 | 211442              | 45.5 | 212429            | 45.5 | Ref.                                 |         | Ref.             |         |
| Central                   | 467           | 17.6 | 89527               | 19.3 | 89994             | 19.3 | 1.12 (1.00-1.25)                     | 0.049   | 0.95 (0.84-1.06) | 0.326   |
| South                     | 1007          | 37.9 | 136735              | 29.4 | 137742            | 29.5 | 1.58 (1.45-1.72)                     | <0.0001 | 1.26 (1.15-1.38) | <0.0001 |
| East and Offshore Islands | 198           | 7.45 | 26727               | 5.75 | 26925             | 5.76 | 1.59 (1.36-1.85)                     | <0.0001 | 1.22 (1.04-1.43) | 0.013   |
| Comorbidity               |               |      |                     |      |                   |      |                                      |         |                  |         |
| DM                        |               |      |                     |      |                   |      |                                      |         |                  |         |
| No                        | 1269          | 47.7 | 295708              | 63.7 | 296977            | 63.6 | Ref.                                 |         | Ref.             |         |

|               |      |      |        |      |        |      |                  |         |                  |         |
|---------------|------|------|--------|------|--------|------|------------------|---------|------------------|---------|
| Yes           | 1390 | 52.3 | 168723 | 36.3 | 170113 | 36.4 | 1.92 (1.78-2.07) | <0.0001 | 1.63 (1.47-1.81) | <0.0001 |
| Hypertension  |      |      |        |      |        |      |                  |         |                  |         |
| No            | 1013 | 38.1 | 193554 | 41.7 | 194567 | 41.7 | Ref.             |         | Ref.             |         |
| Yes           | 1646 | 61.9 | 270877 | 58.3 | 272523 | 58.3 | 1.16 (1.07-1.26) | 0.0002  | 1.04 (0.96-1.13) | 0.328   |
| NAFLD         |      |      |        |      |        |      |                  |         |                  |         |
| No            | 2581 | 97.1 | 455788 | 98.1 | 458369 | 98.1 | Ref.             |         | Ref.             |         |
| Yes           | 78   | 2.93 | 8643   | 1.86 | 8721   | 1.87 | 1.59 (1.27-2.00) | <0.0001 | 1.38 (1.09-1.74) | 0.007   |
| ALD           |      |      |        |      |        |      |                  |         |                  |         |
| No            | 2609 | 98.1 | 461796 | 99.4 | 464405 | 99.4 | Ref.             |         | Ref.             |         |
| Yes           | 50   | 1.88 | 2635   | 0.57 | 2685   | 0.57 | 3.36 (2.53-4.46) | <0.0001 | 1.56 (1.15-2.12) | 0.005   |
| HBV           |      |      |        |      |        |      |                  |         |                  |         |
| No            | 2272 | 85.5 | 451207 | 97.2 | 453479 | 97.1 | Ref.             |         | Ref.             |         |
| Yes           | 387  | 14.6 | 13224  | 2.85 | 13611  | 2.91 | 5.81 (5.21-6.48) | <0.0001 | 3.89 (3.45-4.39) | <0.0001 |
| HCV           |      |      |        |      |        |      |                  |         |                  |         |
| No            | 2414 | 90.8 | 459124 | 98.9 | 461538 | 98.8 | Ref.             |         | Ref.             |         |
| Yes           | 245  | 9.21 | 5307   | 1.14 | 5552   | 1.19 | 8.78 (7.68-10.0) | <0.0001 | 4.42 (3.81-5.13) | <0.0001 |
| Cirrhosis     |      |      |        |      |        |      |                  |         |                  |         |
| No            | 2324 | 87.4 | 461205 | 99.3 | 463529 | 99.2 | Ref.             |         | Ref.             |         |
| Yes           | 335  | 12.6 | 3226   | 0.69 | 3561   | 0.76 | 20.6 (18.3-23.2) | <0.0001 | 9.90 (8.66-11.3) | <0.0001 |
| Metformin use |      |      |        |      |        |      |                  |         |                  |         |
| No            | 1756 | 66.0 | 353649 | 76.2 | 355405 | 76.1 | Ref.             |         | Ref.             |         |
| Yes           | 903  | 34.0 | 110782 | 23.9 | 111685 | 23.9 | 1.64 (1.52-1.78) | <0.0001 | 1.06 (0.95-1.18) | 0.299   |

HCC, hepatocellular carcinoma; DM, diabetes mellitus NTD, New Taiwan Dollar; NAFLD, non-alcoholic fatty liver disease; ALD, alcohol-related liver diseases; HBV, hepatitis B virus; HCV, hepatitis C virus.

Table S2. Case-control analysis of hepatocellular carcinoma in the non-Statins user cohort

| Variable                  | HCC<br>N=5937 |      | Non-HCC<br>N=461153 |      | Total<br>N=467090 |      | OR (95% CI)      |         |                  |         |
|---------------------------|---------------|------|---------------------|------|-------------------|------|------------------|---------|------------------|---------|
|                           | N             | %    | n                   | %    | n                 | %    | Crude            | p       | Adjusted         | p       |
| Age, year                 |               |      |                     |      |                   |      |                  |         |                  |         |
| 40-54                     | 1243          | 20.9 | 167588              | 36.3 | 168831            | 36.2 | Ref.             |         | Ref.             |         |
| 55-64                     | 1810          | 30.5 | 139338              | 30.2 | 141148            | 30.2 | 1.75 (1.63-1.88) | <0.0001 | 1.84 (1.70-1.98) | <0.0001 |
| 65-80                     | 2884          | 48.6 | 154227              | 33.4 | 157111            | 33.6 | 2.52 (2.36-2.70) | <0.0001 | 2.53 (2.36-2.72) | <0.0001 |
| Sex                       |               |      |                     |      |                   |      |                  |         |                  |         |
| Men                       | 3818          | 64.3 | 233133              | 50.5 | 236951            | 50.7 | 1.76 (1.67-1.86) | <0.0001 | 1.86 (1.76-1.97) | <0.0001 |
| Women                     | 2119          | 35.7 | 228020              | 49.5 | 230139            | 49.3 | Ref.             |         | Ref.             |         |
| Income, NTD               |               |      |                     |      |                   |      |                  |         |                  |         |
| <16500                    | 1155          | 19.5 | 100758              | 21.9 | 101913            | 21.8 | 1.24 (1.29-1.56) | <0.0001 | 1.23 (1.12-1.35) | <0.0001 |
| 16500-21900               | 2830          | 47.7 | 142584              | 30.9 | 145414            | 31.1 | 2.46 (2.26-2.67) | <0.0001 | 2.20 (2.02-2.40) | <0.0001 |
| 21901-31800               | 709           | 11.9 | 87852               | 19.1 | 88561             | 19.0 | Ref.             |         | Ref.             |         |
| >31800                    | 1243          | 20.9 | 129959              | 28.2 | 131202            | 28.1 | 1.19 (1.08-1.30) | 0.0003  | 1.28 (1.17-1.41) | <0.0001 |
| Living area               |               |      |                     |      |                   |      |                  |         |                  |         |
| North                     | 2066          | 34.8 | 210029              | 45.5 | 212095            | 45.4 | Ref.             |         | Ref.             |         |
| Central                   | 1108          | 18.7 | 89237               | 19.4 | 90345             | 19.3 | 1.26 (1.17-1.36) | <0.0001 | 1.05 (0.97-1.13) | 0.228   |
| South                     | 2410          | 40.6 | 135859              | 29.5 | 138269            | 29.6 | 1.80 (1.70-1.91) | <0.0001 | 1.41 (1.33-1.50) | <0.0001 |
| East and Offshore Islands | 353           | 5.95 | 26028               | 5.64 | 26381             | 5.65 | 1.38 (1.23-1.55) | <0.0001 | 1.12 (0.99-1.26) | 0.053   |
| Comorbidity               |               |      |                     |      |                   |      |                  |         |                  |         |
| DM                        |               |      |                     |      |                   |      |                  |         |                  |         |
| No                        | 2978          | 50.2 | 304708              | 66.1 | 307686            | 65.9 | Ref.             |         | Ref.             |         |
| Yes                       | 2959          | 49.8 | 156445              | 33.9 | 159404            | 34.1 | 1.94 (1.84-2.04) | <0.0001 | 1.45 (1.35-1.56) | <0.0001 |
| Hypertension              |               |      |                     |      |                   |      |                  |         |                  |         |
| No                        | 2362          | 39.8 | 190923              | 41.4 | 193285            | 41.4 | Ref.             |         | Ref.             |         |
| Yes                       | 3575          | 60.2 | 270230              | 58.6 | 273805            | 58.6 | 1.07 (1.02-1.13) | 0.012   | 0.86 (0.82-0.91) | <0.0001 |
| NAFLD                     |               |      |                     |      |                   |      |                  |         |                  |         |
| No                        | 5802          | 97.7 | 452635              | 98.2 | 458437            | 98.2 | Ref.             |         | Ref.             |         |
| Yes                       | 135           | 2.27 | 8518                | 1.85 | 8653              | 1.85 | 1.24 (1.40-1.47) | 0.016   | 1.07 (0.90-1.28) | 0.450   |
| ALD                       |               |      |                     |      |                   |      |                  |         |                  |         |
| No                        | 5833          | 98.3 | 458438              | 99.4 | 464271            | 99.4 | Ref.             |         | Ref.             |         |

|               |      |      |        |      |        |      |                  |         |                  |         |
|---------------|------|------|--------|------|--------|------|------------------|---------|------------------|---------|
| Yes           | 104  | 1.75 | 2715   | 0.59 | 2819   | 0.60 | 3.01 (2.47-3.67) | <0.0001 | 1.43 (1.15-1.78) | 0.001   |
| HBV           |      |      |        |      |        |      |                  |         |                  |         |
| No            | 5395 | 90.9 | 447921 | 97.1 | 453316 | 97.1 | Ref.             |         | Ref.             |         |
| Yes           | 542  | 9.13 | 13232  | 2.87 | 13774  | 2.95 | 3.40 (3.11-3.72) | <0.0001 | 2.84 (2.58-3.13) | <0.0001 |
| HCV           |      |      |        |      |        |      |                  |         |                  |         |
| No            | 5338 | 89.9 | 455895 | 98.9 | 461233 | 98.8 | Ref.             |         | Ref.             |         |
| Yes           | 599  | 10.1 | 5258   | 1.14 | 5857   | 1.25 | 9.73 (8.90-10.6) | <0.0001 | 5.93 (5.38-6.53) | <0.0001 |
| Cirrhosis     |      |      |        |      |        |      |                  |         |                  |         |
| No            | 5338 | 89.9 | 457672 | 99.3 | 463010 | 99.1 | Ref.             |         | Ref.             |         |
| Yes           | 599  | 10.1 | 3481   | 0.75 | 4080   | 0.87 | 14.8 (13.5-16.2) | <0.0001 | 7.62 (6.89-8.43) | <0.0001 |
| Metformin use |      |      |        |      |        |      |                  |         |                  |         |
| No            | 4031 | 67.9 | 364516 | 79.0 | 368547 | 78.9 | Ref.             |         | Ref.             |         |
| Yes           | 1906 | 32.1 | 96637  | 21.0 | 98543  | 21.1 | 1.78 (1.69-1.88) | <0.0001 | 1.04 (0.96-1.12) | 0.310   |

HCC, hepatocellular carcinoma; DM, diabetes mellitus NTD, New Taiwan Dollar; NAFLD, non-alcoholic fatty liver disease; ALD, alcohol-related liver diseases; HBV, hepatitis B virus; HCV, hepatitis C virus.
